# Supplementary material for: Identification of clinical phenotypes of peripheral involvement in patients with spondyloarthritis, including psoriatic arthritis: a cluster analysis in the worldwide ASAS-PerSpA study
Source: HighWire-hosted journal article supplement (doi:10.1136/rmdopen-2021-001728), 2021-11-01
Supplement: rmdopen-2021-001728supp001_data_supplement.pdf [file rmdopen-2021-001728supp001_data_supplement.pdf]

**Identification of clinical phenotypes according to peripheral musculoskeletal manifestations in patients with spondyloarthritis, including psoriatic arthritis: a cluster analysis in the worldwide ASAS-PerSpA study.**

**Supplementary material**

**Supplementary Figure S1. Multiple Correspondence Analysis with regard to the location of all the peripheral manifestations.**

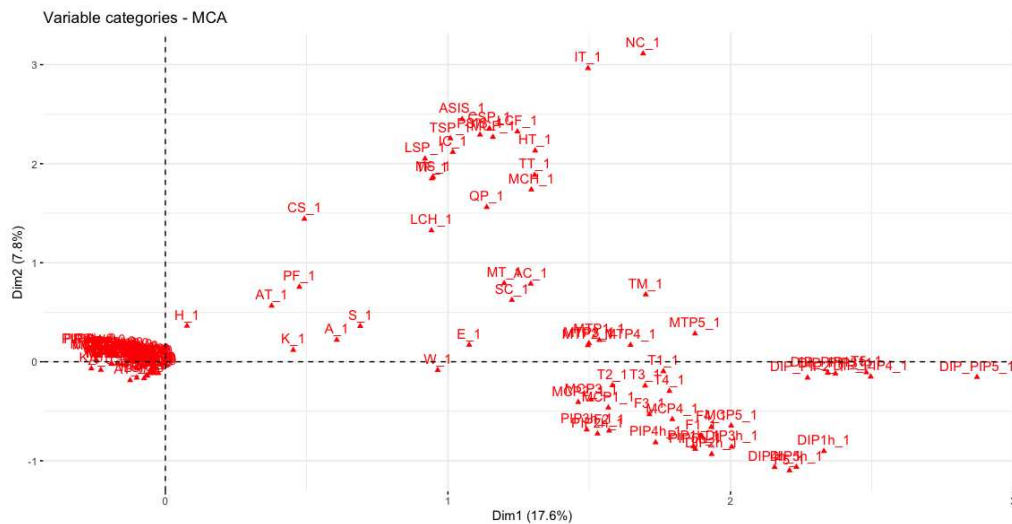

Categories that end in 1 or 0: presence or absence.

MCA: Multiple correspondence analysis

Peripheral joint disease: A: Ankle; AC: acromioclavicular joint; DIPh: distal interphalangeal joint of the hand; DIP\_PIP: distal interphalangeal or proximal interphalangeal joint of the feet; E: Elbow; H: hip; K: Knee; MCP: metacarpophalangeal; MT: midtarsal; MTP: metatarsophalangeal; PIPh: proximal interphalangeal joint of the hand; S: Shoulder; SC: sternoclavicular joint; TM: temporomandibular joint; W: wrist  
For MCP, PIPh and DIPh: the specific location of the finger is indicated (1 to 5)  
For MTP and DIPorPIP: the specific location of the toe is indicated (1 to 5)

Enthesitis: ASIS: Anterior superior iliac spines; AT: Achilles tendon; CS: Chondrosternal; CSP: cervical spinous processes; HT: humeral tuberosity; IC: iliac crests; IT: ischial tuberosities; LCF: lateral condyle of the femur; LCH: lateral condyle of the humerus; LSP: lumbar spinous processes; MCH: medial condyle of the humerus; MCF: medial condyle of the femur; MS: manubriosternal; NC: nuchal crests; PF: plantar fascia; PSIS: posterior superior iliac processes; QP: quadriceps insertion on the superior border of patella; TF: greater trochanter of the femur; TSP: Thoracic spinous processes; TT: tibial tubercle

Dactylitis: F: Finger; T: Toe.

For fingers and toes: the specific location of the finger or toe is indicated (1 to 5)

### Supplementary Figure S2. Multiple Correspondence Analysis with regard to the location of arthritis.

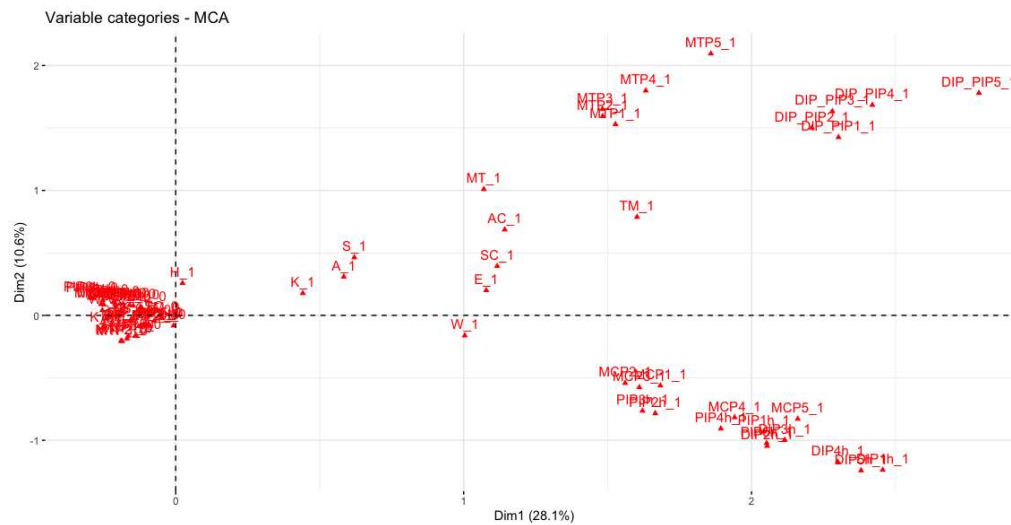

Categories that end in 1 or 0: presence or absence.

MCA: Multiple correspondence analysis

A: Ankle; AC: acromioclavicular joint; DIPh: distal interphalangeal joint of the hand; DIP\_PIP: distal interphalangeal or proximal interphalangeal joint of the feet; E: Elbow; H: hip; K: Knee; MCP: metacarpophalangeal; MT: midtarsal; MTP: metatarsophalangeal; PIPh: proximal interphalangeal joint of the hand; S: Shoulder; SC: sternoclavicular joint; TM: temporomandibular joint; W: wrist

For MCP, PIPh and DIPh: the specific location of the finger is indicated (1 to 5)

For MTP and DIPorPIP: the specific location of the toe is indicated (1 to 5)

### Supplementary Figure S3. Multiple Correspondence Analysis with regard to the location of enthesitis.

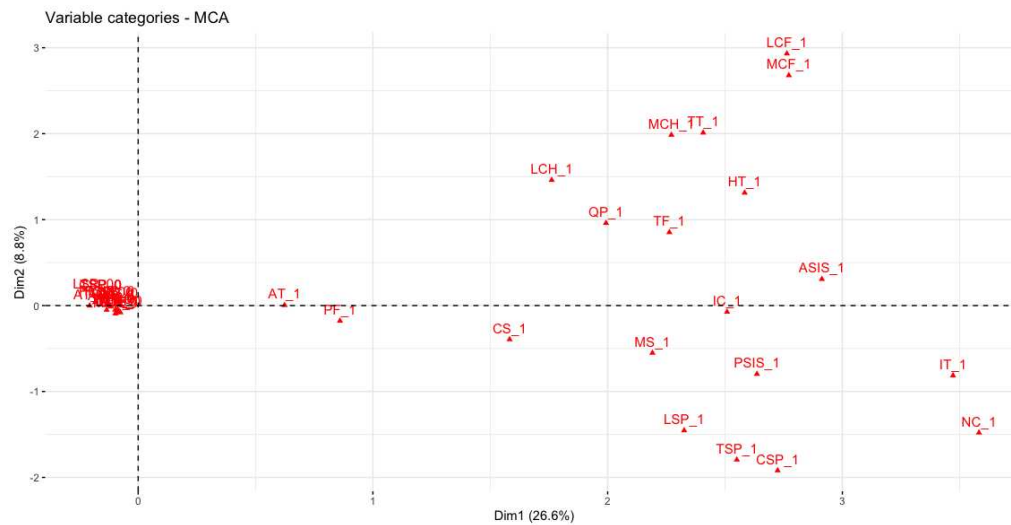

ASIS: Anterior superior iliac spines; AT: Achilles tendon; CS: Chondrosternal; CSP: cervical spinous processes; HT: humeral tuberosity; IC: iliac crests; IT: ischial tuberosities; LCF: lateral condyle of the femur; LCH: lateral condyle of the humerus; LSP: lumbar spinous processes; MCH: medial condyle of the humerus; MCF: medial condyle of the femur; MS: manubriosternal; NC: nuchal crests; PF: plantar fascia; PSIS: posterior superior iliac processes; QP: quadriceps insertion on the superior border of patella; TF: greater trochanter of the femur; TSP: Thoracic spinous processes; TT: tibial tubercle

**Supplementary Figure S4. Multiple Correspondence Analysis with regard to the location of dactylitis.**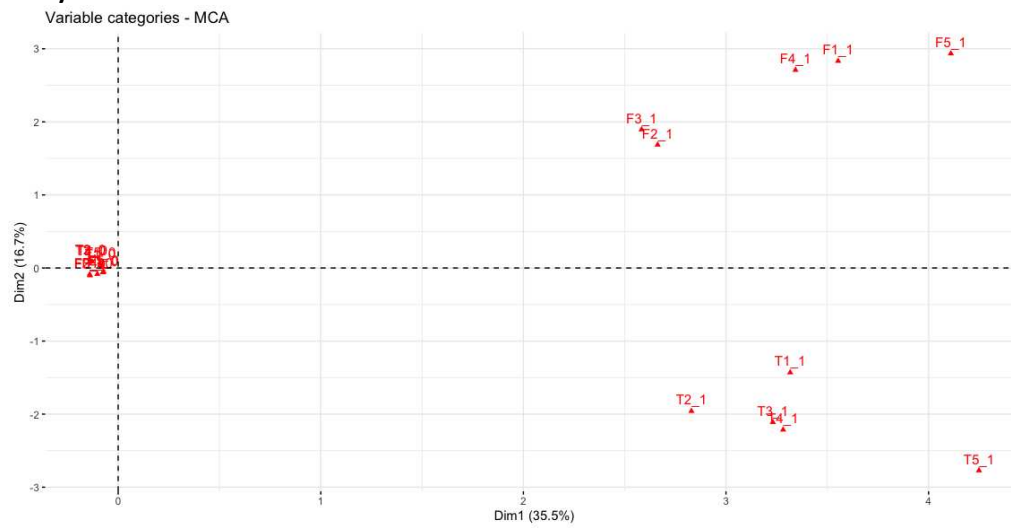

F: Finger; T: Toe.

For fingers and toes: the specific location of the finger or toe is indicated (1 to 5)

Supplementary Table S1. Distribution of clusters across geographical regions.

|                                                                                                  | Latin America<br>N = 538 | Europe and<br>North America<br>N = 1677 | Asia<br>N = 975 | Middle East and<br>North Africa<br>N = 1275 |
|--------------------------------------------------------------------------------------------------|--------------------------|-----------------------------------------|-----------------|---------------------------------------------|
| <b>Clusters with regard to the location of all the peripheral musculoskeletal manifestations</b> |                          |                                         |                 |                                             |
| Cluster 1                                                                                        | 425 (79.0%)              | 1513 (90.2%)                            | 867 (88.9%)     | 1179 (92.5%)                                |
| Cluster 2                                                                                        | 113 (21.0%)              | 164 (9.8%)                              | 108 (11.1%)     | 96 (7.5%)                                   |
| <b>Clusters with regard to the location of the arthritis</b>                                     |                          |                                         |                 |                                             |
| Cluster 1                                                                                        | 402 (74.7%)              | 1436 (85.6%)                            | 846 (86.8%)     | 1146 (89.9%)                                |
| Cluster 2                                                                                        | 27 (5.0%)                | 37 (2.2%)                               | 33 (3.4%)       | 18 (1.4%)                                   |
| Cluster 3                                                                                        | 109 (20.3%)              | 204 (12.2%)                             | 96 (9.8%)       | 111 (8.7%)                                  |
| <b>Clusters with regard to the location of the enthesitis</b>                                    |                          |                                         |                 |                                             |
| Cluster 1                                                                                        | 420 (78.1%)              | 1592 (94.9%)                            | 901 (92.4%)     | 1176 (92.2%)                                |
| Cluster 2                                                                                        | 88 (16.3%)               | 56 (3.4%)                               | 46 (4.7%)       | 66 (5.2%)                                   |
| Cluster 3                                                                                        | 30 (5.6%)                | 29 (1.7%)                               | 28 (2.9%)       | 33 (2.6%)                                   |
| <b>Clusters with regard to the location of the dactylitis</b>                                    |                          |                                         |                 |                                             |
| Cluster 1                                                                                        | 510 (94.8%)              | 1628 (97.1%)                            | 907 (93.0%)     | 1246 (97.7%)                                |
| Cluster 2                                                                                        | 27 (5.0%)                | 45 (2.7%)                               | 43 (4.4%)       | 25 (2.0%)                                   |
| Cluster 3                                                                                        | 1 (0.2%)                 | 4 (2.4%)                                | 25 (2.6%)       | 4 (0.3%)                                    |
